# Supplementary material
Source: PubMed Central journal article supplement (PMC6295323)
Supplement: NIHMS997592-supplement-Table.pdf [file NIHMS997592-supplement-Table.pdf]

**Supplementary Table**

**Figure 2A. AFC**

| Group                    | N  | Mean  | SD   | Mean difference (vs. Control) |          | Mean difference (vs. <i>E. Coli pneumonia</i> ) |          | Mean difference (vs. NHLF MV) |          | Overall P-value |
|--------------------------|----|-------|------|-------------------------------|----------|-------------------------------------------------|----------|-------------------------------|----------|-----------------|
|                          |    |       |      | 95% CI                        | P-value* | 95% CI                                          | P-value* | 95% CI                        | P-value* |                 |
| Control                  | 37 | 6.78  | 2.19 | (reference)                   |          | -                                               |          | -                             |          | <0.001          |
| <i>E. Coli pneumonia</i> | 9  | 4.76  | 4.92 | -0.14 - 4.19                  | >0.999   | (reference)                                     |          | -                             |          |                 |
| NHLF MV                  | 5  | 0     | 0    | -8.79 - -4.78                 | 0.002    | -9.63 – 0.12                                    | 0.237    | (reference)                   |          |                 |
| + MSC MV 1x              | 6  | 16.51 | 5.76 | 7.16 – 12.28                  | <0.001   | 5.76 – 17.74                                    | <0.001   | 10.62 – 22.39                 | <0.001   |                 |
| + MSC MV 2x              | 6  | 12.31 | 3.57 | 3.40 – 7.67                   | 0.008    | 2.50 – 12.63                                    | 0.001    | 8.67 – 15.96                  | <0.001   |                 |
| + Poly(I:C) MSC MV       | 11 | 13.35 | 4.58 | 4.57 – 8.56                   | <0.001   | 4.12 – 13.06                                    | <0.001   | 8.87 – 17.82                  | <0.001   |                 |

\*P-values were given by ANOVA test followed by Bonferroni adjustment. For the mean differences of the pair group comparisons, 95% confidence interval (CI) were calculated by unpaired t-tests.

**Figure 3A. BAL CFU Counts**

| Group                    | N  | Median            | 25% - 75% Percentile                | Median difference (vs. <i>E. Coli pneumonia</i> ) |          | Median difference (vs. NHLF MV)      |          | Overall P-value |
|--------------------------|----|-------------------|-------------------------------------|---------------------------------------------------|----------|--------------------------------------|----------|-----------------|
|                          |    |                   |                                     | 95% CI                                            | P-value* | Estimate (95% CI)                    | P-value* |                 |
| <i>E. Coli pneumonia</i> | 8  | $8.6 \times 10^7$ | $3.3 \times 10^7 - 1.2 \times 10^9$ | (reference)                                       |          | --                                   |          | 0.016           |
| NHLF MV                  | 5  | $1.5 \times 10^8$ | $3.5 \times 10^6 - 6.2 \times 10^8$ | $-1.3 \times 10^9 - 5.5 \times 10^8$              | >0.999   | (reference)                          |          |                 |
| + MSC MV 1x              | 6  | $1.5 \times 10^7$ | $9.0 \times 10^6 - 9.9 \times 10^7$ | $-1.3 \times 10^9 - 3.1 \times 10^6$              | 0.650    | $-6.5 \times 10^7 - 6.2 \times 10^8$ | >0.999   |                 |
| + MSC MV 2x              | 6  | $2.8 \times 10^7$ | $1.8 \times 10^7 - 5.1 \times 10^7$ | $-1.3 \times 10^9 - 3.7 \times 10^6$              | >0.999   | $-4.6 \times 10^7 - 6.1 \times 10^8$ | >0.999   |                 |
| + Poly(I:C) MSC MV       | 11 | $7.2 \times 10^6$ | $3.6 \times 10^6 - 2.0 \times 10^7$ | $1.8 \times 10^7 - 1.3 \times 10^9$               | 0.007    | $-6.1 \times 10^6 - 6.2 \times 10^8$ | 0.599    |                 |

\*P-values given by Post-Hoc Dunn's Analyses Following Kruskal Wallis Test. For the mean differences of the pair group comparisons, 95% CIs were calculated by Hodges-Lehmann estimation of the location shift between the two groups.

**Figure 3B. Perfusate CFU Counts**

| Group                    | N  | Median  | 25% - 75% Percentile           | Median difference<br>(vs. <i>E. Coli pneumonia</i> ) |          | Median difference<br>(vs. NHLF MV)             |          | Overall<br>P-value |
|--------------------------|----|---------|--------------------------------|------------------------------------------------------|----------|------------------------------------------------|----------|--------------------|
|                          |    |         |                                | 95% CI                                               | P-value* | 95% CI                                         | P-value* |                    |
| <i>E. Coli pneumonia</i> | 7  | 258,650 | 71,900 – 9.5 x 10 <sup>6</sup> | (reference)                                          |          | --                                             |          | 0.624              |
| NHLF MV                  | 5  | 385,600 | 0 – 5.4 x 10 <sup>6</sup>      | -9.5 x 10 <sup>6</sup> – 1.4 x 10 <sup>6</sup>       | >0.999   | (reference)                                    |          |                    |
| + MSC MV 1x              | 6  | 335,120 | 0 – 3.1 x 10 <sup>6</sup>      | -9.5 x 10 <sup>6</sup> – 2.9 x 10 <sup>6</sup>       | >0.999   | -2.8 x 10 <sup>6</sup> – 6.3 x 10 <sup>6</sup> | >0.999   |                    |
| + MSC MV 2x              | 6  | 116,320 | 14,160 – 6.3 x 10 <sup>6</sup> | -9.4 x 10 <sup>6</sup> – 5.2 x 10 <sup>6</sup>       | >0.999   | -5.2 x 10 <sup>6</sup> – 9.2 x 10 <sup>6</sup> | >0.999   |                    |
| + Poly(I:C) MSC MV       | 11 | 106,040 | 0 – 424,800                    | -91,260 – 9.4 x 10 <sup>6</sup>                      | >0.999   | -125,320 – 8.4 x 10 <sup>6</sup>               | >0.999   |                    |

\*P-values given by Post-Hoc Dunn's Analyses Following Kruskal Wallis Test. For the mean differences of the pair group comparisons, 95% CIs were calculated by Hodges-Lehmann estimation of the location shift between the two groups.

**Figure 3C. Macrophage Phagocytosis (% of LPS Injured)**

| Group        | N | Median | 25% - 75% Percentile | Median difference<br>(vs. Control) |          | Median difference<br>(vs. LPS) |          | Overall<br>P-value |
|--------------|---|--------|----------------------|------------------------------------|----------|--------------------------------|----------|--------------------|
|              |   |        |                      | 95% CI                             | P-value* | 95% CI                         | P-value* |                    |
| Control      | 8 | 107    | 82 – 136             | (reference)                        |          | --                             |          | 0.026              |
| LPS          | 8 | 102    | 96 – 123             | -26 – 41                           | >0.999   | (reference)                    |          |                    |
| LPS + MSC MV | 8 | 70     | 57 – 87              | 2 – 68                             | 0.078    | 9 – 64                         | 0.044    |                    |

\*P-values given by Post-Hoc Dunn's Analyses Following Kruskal Wallis Test. For the mean differences of the pair group comparisons, 95% CIs were calculated by Hodges-Lehmann estimation of the location shift between the two groups.

**Figure 4. Absolute Neutrophils Counts**

| Group                    | N  | Median                | 25% - 75% Percentile                      | Median difference<br>(vs. <i>E. Coli pneumonia</i> ) |          | Median difference<br>(vs. NHLF MV)           |          | Overall<br>P-value |
|--------------------------|----|-----------------------|-------------------------------------------|------------------------------------------------------|----------|----------------------------------------------|----------|--------------------|
|                          |    |                       |                                           | 95% CI                                               | P-value* | 95% CI                                       | P-value* |                    |
| <i>E. Coli pneumonia</i> | 9  | 9.1x10 <sup>6</sup>   | 8.6x10 <sup>6</sup> – 2.6x10 <sup>7</sup> | (reference)                                          |          | --                                           |          | 0.024              |
| NHLF MV                  | 5  | 11.0x10 <sup>6</sup>  | 9.7x10 <sup>6</sup> – 3.4x10 <sup>7</sup> | -1.8 x10 <sup>7</sup> – 2.0 x10 <sup>7</sup>         | >0.999   | (reference)                                  |          |                    |
| + MSC MV 1x              | 6  | 5.5x10 <sup>6</sup>   | 3.9x10 <sup>6</sup> – 9.1x10 <sup>6</sup> | -2.1 x10 <sup>7</sup> – -221,100                     | 0.372    | 760,800 – 3.3 x10 <sup>7</sup>               | 0.098    |                    |
| + MSC MV 2x              | 6  | 14.5 x10 <sup>6</sup> | 6.6x10 <sup>6</sup> – 2.1x10 <sup>7</sup> | -1.6 x10 <sup>7</sup> – 1.2 x10 <sup>7</sup>         | >0.999   | -1.1 x10 <sup>7</sup> – 2.6 x10 <sup>7</sup> | >0.999   |                    |
| + Poly(I:C) MSC MV       | 11 | 7.2 x10 <sup>6</sup>  | 4.7x10 <sup>6</sup> – 9.9x10 <sup>6</sup> | 80,700 – 1.9 x10 <sup>7</sup>                        | 0.415    | 967,800 – 2.8 x10 <sup>7</sup>               | 0.104    |                    |

\*P-values given by Post-Hoc Dunn's Analyses Following Kruskal Wallis Test. For the mean differences of the pair group comparisons, 95% CIs were calculated by Hodges-Lehmann estimation of the location shift between the two groups.

**Figure 5. Lung Protein Permeability**

| Group                    | N | Mean | SD   | Mean difference<br>(vs. <i>E. Coli pneumonia</i> ) |          | Overall<br>P-value |
|--------------------------|---|------|------|----------------------------------------------------|----------|--------------------|
|                          |   |      |      | 95% CI                                             | P-value* |                    |
| <i>E. Coli pneumonia</i> | 3 | 7.96 | 1.35 | (reference)                                        | -        | 0.001              |
| + MSC MV 1x              | 3 | 2.49 | 1.77 | -9.03 - -1.91                                      | 0.003    |                    |
| + MSC MV 2x              | 3 | 2.38 | 0.97 | -8,23 - -2.92                                      | 0.003    |                    |
| + Poly(I:C) MSC MV       | 4 | 2.19 | 1.01 | -8.05 - -3.51                                      | 0.001    |                    |

\* P-values were given by ANOVA test followed by Bonferroni adjustment. For the mean differences of the pair group comparisons, 95% confidence interval (CI) were calculated by unpaired t-tests.
